# Supplementary material
Source: Research Square preprint supplement (doi:10.21203/rs.3.rs-9092562/v1)
Supplement: Supplementary file 1 [file e528cfde165372da97467997.docx]

# Supplementary Materials

# Relative high heat exposure increases the likelihood of adverse birth outcomes: Multi-country evidence of heat impacts on birth outcomes

Author List:

Lebohang Radebe1,2, Chloe Brimicombe3, Michalis Koureas4, Federica Nobile5,6, Mian Bao7, Paula Pereda Suárez 8, Valentina Colistro8, Elizaveta Fomenko9, Paul Lokubal10, Tobias Monthaler11, Katharina Wieser11, Georgios Charvalis4, Varvara Mouchtouri4, Christos Hadjichristodoulou4, Massimo Stafoggia5,6, Sibusiso Mkwananzi2 , Shobna Sawry2, Alane Izu12, Ziyaad Dangor12 ,Shabir A. Madhi12 , Claudia Hanson13,14,15, Andrea Barnabas Pembe16, Jean-Paul Dossou17 , Hussein Kidanto18, Effie Chipeta19, Mercedes Colomar20, Ilona M. Otto11 , Debra, Jackson21,22, Stanley Luchters23,24,25, Matthew F. Chersich1,2,26, Jeroen de Bont6

on behalf of the HIGH Horizons Study Group

1 Wits Planetary Health Research Division, Faculty of Health Sciences, University of the Witwatersrand, Johannesburg, South Africa

2 Wits RHI, University of the Witwatersrand, Johannesburg, South Africa

3 Department of Social Policy and Intervention, University of Oxford, Barnett House, 32-42 Wellington Square, Oxford, OX1 2ER, United Kingdom

4 Laboratory of Hygiene and Epidemiology, Faculty of Medicine, University of Thessaly, 41222 Larissa, Greece

5 Department of Epidemiology, Lazio Region Health Service /ASL Roma 1, Rome, Italy

6 Institute of Environmental Medicine, Karolinska Institutet, Stockholm, Sweden

7 Division of Clinical Epidemiology, Department of Medicine, Solna, Karolinska Institutet, Stockholm, Sweden

8 Unidad de Investigacion Clinica y Epidemiologica Montevideo (UNICEM), Uruguay

9 Study Centre for Perinatal Epidemiology (SPE), Brussels, Belgium

10Department of Infectious Disease Epidemiology and International Health, Faculty of Epidemiology and Population Health, London School of Hygiene and Tropical Medicine, London, United Kingdom

11 Wegener Center for Climate and Global Change, University of Graz, Austria

12 South African Medical Research Council Vaccines and Infectious Diseases Analytics Research Unit, Faculty of Health Sciences, University of the Witwatersrand, Johannesburg, South Africa

13 Department of Global Public Health, Karolinska Institutet, Stockholm, Sweden

14 Department of Disease Control, Faculty of Infectious and Tropical Diseases, London School of Hygiene and Tropical Medicine, London, United Kingdom

15 Centre of Excellence for Women and Child Health, Aga Khan University, Nairobi, Kenya

16 Department of Obstetrics and Gynaecology, Muhimbili University of Health and Allied Sciences, Dar Es Salaam, Tanzania

17 Centre of Research in Human Reproduction and Demography (CERRHUD), Cotonou, Benin

18The Aga Khan University, Medical College, East Africa, Tanzania

19Centre for Reproductive Health, Kamuzu University of Health Sciences, Department of Community and Environmental Health, Blantyre , Malawi.

20 Women’s, Maternal, Neonatal and Reproductive Health (WH) Unit, Department of Health Systems and Services (HSS), Panamerican Health Organization (PAHO), Washington DC, United States.

21MARCH Centre, London School of Hygiene and Tropical Medicine, Keppel St, London WC1E 7HT, United Kingdom

22 School of Public Health, University of the Western Cape, Cape Town, South Africa

23 Centre for Sexual Health and HIV/AIDS Research (CeSHHAR), Harare, Zimbabwe

24 Liverpool School of Tropical Medicine, Liverpool, United Kingdom

25 Department of Public Health and Primary Care, Ghent University, Ghent, Belgium

26 Public Health and Primary Care, Trinity College Dublin, Dublin, Ireland

**Legend**

**Tables:**

Supplementary Table 1. Description of the Data Sources

Supplementary Table 2. Ethical Approvals for each Study Partner.

Supplementary Table 3. Description of Heat Metrics

Supplementary Table 4. Parameters for Sensitivity Analyses

Supplementary Table 5. Details of Effect Modifiers

**Figures:**

Supplementary Figure 1. Leave-One-Out Analysis for a) Preterm birth b) Stillbirth and c) Low Apgar Score

Supplementary Figure 2. Sensitivity Analyses. All lines represent meta-analysis estimates. a) Models. Poly = polynomial, with 2 or 3 degrees of freedom. Ns = natural cubic spline with 3, 4 or 5 knots. Main model = natural cubic spline with 2 knots. b) Knot points. Main model

Supplementary Figure 3. Correlation matrices between minimum, mean and maximum variation of temperature, Wet Bulb Globe Temperature, Universal Thermal Climate Index and Heat Index. MIN = minimum. MEAN = mean. MAX = maximum. TEMP = 2m air temperature. WBGT = Wet Bulb Globe Temperature. UTCI = Universal Thermal Climate Index. HEAT IND = Heat Index

Supplementary Figure 4. Meta-Analysis Estimates of Effect of Heat Index, Wet Bulb Globe Temperature, Universal Thermal Climate Index and Temperature on Preterm Birth Still Birth and low Apgar. a) Mean Heat Metrics. b) Maximum Heat Metrics. c) Minimum Heat Metrics.

Supplementary Figure 5. Exposure-response relationships between minimum, mean and maximum variation of temperature (a-c), wet bulb globe temperature (d-f), universal thermal climate index (h-j), heat index (k-m) and preterm birth.

Supplementary Figure 6. Exposure-response relationships between minimum, mean and maximum of temperature (a-c), wet bulb globe temperature (d-f), universal thermal climate index (h-j), heat index (k-m) and stillbirth.

Supplementary Figure 7. Exposure-response relationships between minimum, mean, maximum and diurnal variation of temperature (a-c), wet bulb globe temperature (d-f), universal thermal climate index (g-i), heat index (j-l) and low APGAR score

Supplementary Figure 8. Comparing meta-analysis effect estimates for the association between heat metrics and preterm birth using a) maximum temperature and b) maximum wet bulb globe temperature. c) maximum universal thermal climate index d) heat index

Supplementary Figure 9. Effect modification by a) Maternal age (in years). Main model = all ages. >35 does not contain results from Benin, Malawi, Tanzania or Uganda due to small sample sizes. b) Infant sex.

| Continent | Country/  Region | Data Collection Method | Time Period | Number of Singleton Births | Diagnostic Criteria for Gestational age | Data Provider to HIGH Horizons Project |
| --- | --- | --- | --- | --- | --- | --- |
| Africa | Benin | Hospital Birth Registry (four hospitals) | 2021-2023 | 26,438 | * | The ALERT Project |
| Malawi | Hospital Birth Registry (four hospitals) | 2021-2023 | 50,539 | * | The ALERT Project |
| Soweto, South Africa | Sub-District Birth Registry (nine midwife-led clinics and one tertiary referral hospital) | 2017 - 2022 | 189,669 | LMP | Wits VIDA |
| Tanzania | Hospital Birth Registry (four hospitals) | 2021-2023 | 23,837 | * | The ALERT Project |
| Uganda | Hospital Birth Registry (four hospitals) | 2021-2023 | 37,402 | * | The ALERT Project |
| Europe | Belgium | National Birth Registry |  |  | LMP and ultrasound | Study Centre for Perinatal Epidemiology (SPE) (Flanders) and  Centre d’Épidémiologie Périnatale (CEpiP) |
| Greece | National Birth Registry | 1999 - 2021 | 2,316,655 | LMP and ultrasound | Hellenic Statistical Authority (ELSTAT) |
| Lazio Region, Italy | Regional Birth Registry | 2001 - 2019 | 829,242 | LMP and ultrasound | Certificate of Delivery Care Registry (CEDAP) |
| Sweden | National Birth Registry | 2014 - 2019 | 560,615 | Ultrasound | Swedish Pregnancy Register |
| Latin America and the Caribbean | Argentina | Hospital Birth Registry | 2019-2021 | 16,952 | LMP and ultrasound | PAHO Women’s Health Maternal Network |
| Bolivia | Hospital Birth Registry | 2018-2021 | 10,966 | LMP and ultrasound | PAHO Women’s Health Maternal Network |
| Guatemala | Hospital Birth Registry | 2018-2021 | 12,308 | LMP and ultrasound | PAHO Women’s Health Maternal Network |
| Honduras | Hospital Birth Registry | 2018-2021 | 28,547 | LMP and ultrasound | PAHO Women’s Health Maternal Network |
| The Dominican Republic | Hospital Birth Registry | 2018-2021 | 22,981 | LMP and ultrasound | PAHO Women’s Health Maternal Network |
| Uruguay | Hospital Birth Registry | 2012-2021 | 6,163 | LMP and ultrasound | PAHO Women’s Health Maternal Network |

Supplementary Table 1. Description of the Data Sources . ALERT = Action Leveraging Evidence to reduce perinatal Mortality and morbidity in Sub-Saharan Africa . VIDA = South African Medical Research Council Vaccines and Infectious Diseases Analytics Research Unit, University of Witwatersrand. *Complete with the best obstetric estimate of gestational age at delivery (in completed weeks) based on the care provider’s estimation from the above obstetrical data. If no obstetrical data is found, please use the newborn estimation of gestational age by physical examination to complete this box. For multiple births, please complete with the best estimation of gestational age in all the additional forms

| Continent | Country | Ethics Committee | Law that governs analysis |
| --- | --- | --- | --- |
| Africa | Benin, Malawi, Tanzania, Uganda | Karolinska Institutet, Sweden (Etikprövningsmyndigheten—Dnr 2020–01587); Uganda National Council for Science and Technology (UNCST)—(HS1324ES); Muhimbili University of Health and Allied Sciences (MUHAS) Research and Ethics Committee, Tanzania (MUHAS-REC-04-2020-118); Aga Khan University Ethical Review Committee, Tanzania (AKU/2019/044/fb); College of Medicine Research and Ethics Committee (COMREC), Malawi—(COMREC P.04/20/3038); Comité National d’Ethique pour la Recherche en Santé, Cotonou, Bénin—(83/MS/DC/SGM/CNERS/ST); the institutional review board at the Institute of Tropical Medicine Antwerp; and the Ethics Committee at the University Hospital Antwerp, Belgium—(ITG 1375/20. B3002020000116) |  |
| South Africa | Human Research Ethics Committee, University of Witwatersrand, South Africa |  |
| Europe | Belgium |  | Article 9 of the Royal Decree of 14 July 1999 |
| Greece | Research Ethics Committee, University of Thessaly, Greece |  |
| Italy |  | Regional Law no. 4 of 2013, Lazio Region |
| Sweden | National Ethical Review Committee (Etikprövningsmyndigheten), Sweden |  |
| Latin America and the Caribbean | Argentina, Bolivia, Dominican Republic, Guatemala, Honduras, Uruguay | Pan-American Health Organization |  |

Supplementary Table 2. Ethical Approvals for each Study Partner. For Belgium and Italy, additional ethical approval was not required as the data used in this study were collected routinely for epidemiological surveillance and sub-national and national statistics.

| Heat Index | Source | Resolution |
| --- | --- | --- |
| 2m Air Temperature | Obtained directly from C3S CDS | 0.25° x 0.25° |
| Wet Bulb Globe Temperature | Processed using Python Thermofeel library | 0.25° x 0.25° |
| Universal Thermal Climate Index | Processed using Python Thermofeel library | 0.25° x 0.25° |
| Heat Index | Obtained from ECMWF | 0.28° x 0.28° |

Supplementary Table 3. Description of Heat Metrics

| Sensitivity Analysis | Default Parameter | Moderations |
| --- | --- | --- |
| DLNM Smoothing function  Function for arglag and argvar in crossbasis function | Natural cubic B-spline with 2 knots | Polynomial function   - 2 degrees - 3 degrees   Cubic B-Spline, with varying number of knots   - 3 knots - 4 knots - 5 knots |
| Lags  Number of days of lagged exposure | 0-6 days | - 0 days - 0-1 days - 0-2 days - 0-3 days - 0-4 days - 0-5 days |
| Knot points for smoothing function for predictor  Knot points when predictor smoothing function is Natrucal cubic B-spline | 10, 75, 90 | - 5, 50, 95 - 10, 50, 90 - 5, 75, 95 |
| Cantering Value for Predictions  Compares risk at different thresholds | 75th to 99th percentile | - 50th to 95th percentile - 75th to 99th percentile - 75th to 95th percentile |
| Heat Exposure | Mean 2m Air Temperature | 2m Air Temperature, Wet Bulb Globe Temperature, Universal Thermal Climate Index, Heat Index   - Minimum - Mean - Maximum - Diurnal |

Supplementary Table 4. Parameters for Sensitivity Analyses

| Type of Effect Modifier | Effect Modifier | Levels | Details |
| --- | --- | --- | --- |
| Demographic | Maternal Age (years) | <25, 25-35, >35 | Benin, Malawi, Tanzania, and Uganda did not have sufficient volumes for mothers above 35 years of age, and therefore were excluded for the >35 age group |
| Infant Sex | Female, Male | Greece does not have infant sex, and so was excluded from the model |
| Environmental | Koppen-Geiger Climate Zone | A – Tropical  B – Arid  C – Temporate  D – Continental  E – Polar |  |
| Three Hottest Months | Three hottest consecutive months |  |

Supplementary Table 5. Details of Effect Modifiers

Supplementary Figure . Leave-One-Out Analysis for a) Preterm birth b) Stillbirth and c) Low Apgar Score

Supplementary Figure . Sensitivity Analyses. All lines represent meta-analysis estimates. a) Models. Poly = polynomial, with 2 or 3 degrees of freedom. Ns = natural cubic spline with 3, 4 or 5 knots. Main model = natural cubic spline with 2 knots. b) Knot points. Main model

Supplementary Figure 3. Correlation matrices between minimum, mean and maximum variation of temperature, Wet Bulb Globe Temperature, Universal Thermal Climate Index and Heat Index. MIN = minimum. MEAN = mean. MAX = maximum. TEMP = 2m air temperature. WBGT = Wet Bulb Globe Temperature. UTCI = Universal Thermal Climate Index. HEAT IND = Heat Index

Supplementary Figure 5. Meta-Analysis Estimates of Effect of Heat Index, Wet Bulb Globe Temperature, Universal Thermal Climate Index and Temperature on Preterm Birth Still Birth and low Apgar. a) Mean Heat Metrics. b) Maximum Heat Metrics. c) Minimum Heat Metrics.

Supplementary Figure 6. Exposure-response relationships between minimum, mean and maximum variation of temperature (a-c), wet bulb globe temperature (d-f), universal thermal climate index (h-j), heat index (k-m) and preterm birth.

Supplementary Figure 7. Exposure-response relationships between minimum, mean and maximum of temperature (a-c), wet bulb globe temperature (d-f), universal thermal climate index (h-j), heat index (k-m) and stillbirth.

Supplementary Figure 8. Exposure-response relationships between minimum, mean, maximum and diurnal variation of temperature (a-c), wet bulb globe temperature (d-f), universal thermal climate index (g-i), heat index (j-l) and low APGAR score

Supplementary Figure 9. Comparing meta-analysis effect estimates for the association between heat metrics and preterm birth using a) maximum temperature and b) maximum wet bulb globe temperature. c) maximum universal thermal climate index d) heat index

Supplementary Figure 10. Effect modification by a) Maternal age (in years). Main model = all ages. >35 does not contain results from Benin, Malawi, Tanzania or Uganda due to small sample sizes. b) Infant sex. Main model = all
